# Supplementary material for: Exploring the mechanism of aidi injection for lung cancer by network pharmacology approach and molecular docking validation
Source: Oxford University Press journal article supplement (doi:10.1042/bsr20204062), 2021-01-28
Supplement: bsr-2020-4062_supp.pdf [file bsr-2020-4062_supp.pdf]

## **Appendices**

Appendix A. Supplementary material: Drugs and compounds of ADI

Appendix B. Supplementary material: Compounds and putative target genes of ADI

Appendix C. Supplementary material: Putative target genes of lung cancer from Genecard, OMIM and TTD database

Appendix D. Supplementary material: Common putative target genes information between ADI and lung cancer
